# Supplementary material for: Engineering Toolbox for Systematic Design of PolyHIPE Architecture
Source: MDPI journal article supplement (doi:10.3390/polym13091479), 2021-05-04
Supplement: s1 [file s1]

## Supplemental Figures:

**Supplemental Table 1:** Composition matrix of HIPEs fabricated at different parameters for each of the four macromers PFMDA, NGDA, BDDA, and BDMA. (Not applicable = n.a.)

| Macromer | Surfactant<br>Concentration<br>(wt %) | Mixing Speed | Toluene Diluent<br>(mol %) | BDT Diluent<br>(mol %) |
|----------|---------------------------------------|--------------|----------------------------|------------------------|
| PFDMA    | 5                                     | 500          | 0                          | 0                      |
|          | 10                                    | 1000         | 30                         | 10                     |
|          | 20                                    | 2000         | 50                         | 20                     |
|          |                                       |              | 70                         | 30                     |
| NGDA     | 5                                     | 500          | 0                          | 0                      |
|          | 10                                    | 1000         | 30                         | 10                     |
|          | 20                                    | 2000         | 50                         | 20                     |
|          |                                       |              | n.a.                       | 30                     |
| BDDA     | 5                                     | 500          | 0                          | 0                      |
|          | 10                                    | 1000         | 30                         | 10                     |
|          | 20                                    | 2000         | n.a.                       | 20                     |
|          |                                       |              | n.a.                       | 30                     |
| BDMA     | 5                                     | 500          | 0                          | 0                      |
|          | 10                                    | 1000         | 30                         | 10                     |
|          | 20                                    | 2000         | n.a.                       | 20                     |
|          |                                       |              | n.a.                       | 30                     |

**Supplemental Table 2:** Gel fraction and cure time for BDDA, NGDA, BDMA and PFDMA polyHIPEs fabricated at increasing mixing speeds, increasing surfactant concentrations, and increasing diluent concentrations.

| Macromer | Composition | Gel Fraction (%) | Cure Time (Mins) |
|----------|-------------|------------------|------------------|
| BDDA     | 500 RPM     | 97 ± 2           | 2.5              |
|          | 1000 RPM    | 99 ± 3           | 2.5              |
|          | 2000 RPM    | 94 ± 5           | 2.2              |
|          | 5% PGPR     | 98 ± 2           | 2.5              |
|          | 10% PGPR    | 99 ± 1           | 2.5              |
|          | 20% PGPR    | 97 ± 2           | 2.5              |
|          | 10 % BDT    | 99 ± 1           | 2                |
|          | 20% BDT     | 98 ± 2           | 1.5              |
|          | 30% BDT     | 99 ± 1           | < 1              |
|          | 30% Toluene | 96 ± 2           | 3                |
| NGDA     | 500 RPM     | 93 ± 1           | 2.5              |
|          | 1000 RPM    | 99 ± 1           | 2.5              |
|          | 2000 RPM    | 99 ± 1           | 2.7              |
|          | 5% PGPR     | 98 ± 1           | 2.5              |
|          | 10% PGPR    | 97 ± 1           | 2.6              |
|          | 20% PGPR    | 98 ± 3           | 2.5              |
|          | 10 % BDT    | 97 ± 1           | 2                |
|          | 20% BDT     | 98 ± 1           | 1.3              |
|          | 30% BDT     | 99 ± 1           | < 1              |
|          | 30% Toluene | 92 ± 2           | 2.7              |
|          | 50% Toluene | 93 ± 3           | 2.6              |
| BDMA     | 500 RPM     | 94 ± 3           | 4                |
|          | 1000 RPM    | 95 ± 2           | 3.5              |

|       |             |            |     |
|-------|-------------|------------|-----|
|       | 2000 RPM    | $93 \pm 1$ | 3   |
|       | 5% PGPR     | $95 \pm 2$ | 4   |
|       | 10% PGPR    | $95 \pm 1$ | 4   |
|       | 20% PGPR    | $86 \pm 4$ | 3.8 |
|       | 10 % BDT    | $95 \pm 2$ | 3   |
|       | 20% BDT     | $96 \pm 2$ | 2.5 |
|       | 30% BDT     | $96 \pm 4$ | 2.5 |
|       | 30% Toluene | $93 \pm 2$ | 3   |
| PFDMA | 500 RPM     | $86 \pm 3$ | 6   |
|       | 1000 RPM    | $85 \pm 1$ | 6.5 |
|       | 2000 RPM    | $92 \pm 1$ | 6.5 |
|       | 5% PGPR     | $86 \pm 2$ | 5   |
|       | 10% PGPR    | $87 \pm 3$ | 5.7 |
|       | 20% PGPR    | $83 \pm 2$ | 5.6 |
|       | 10 % BDT    | $92 \pm 3$ | 4   |
|       | 20% BDT     | $94 \pm 2$ | 2.5 |
|       | 30% BDT     | $97 \pm 1$ | 2.5 |
|       | 30% Toluene | $88 \pm 3$ | 4.5 |
|       | 50% Toluene | $84 \pm 3$ | 4.3 |
|       | 70% Toluene | $86 \pm 3$ | 4   |

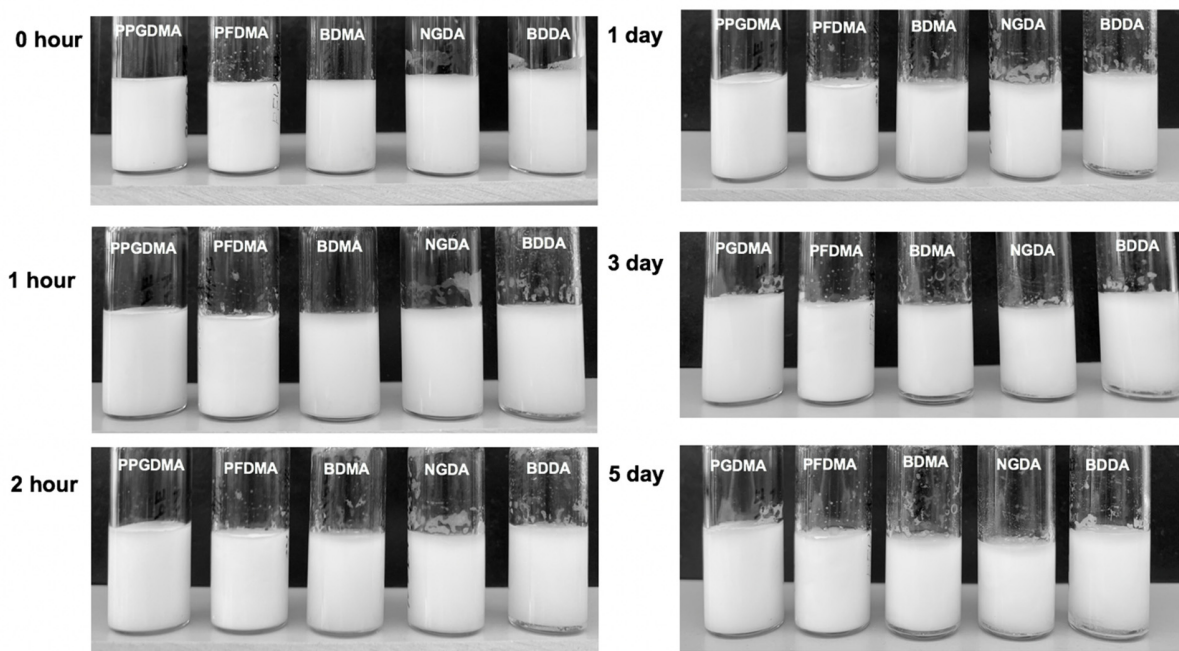

**Supplemental Figure 1:** Photographs of HIPEs fabricated for PPGDMA, PFDMA, BDMA, NGDA, and BDDA at various time points. Phase separation can be observed at the bottom of the glass vials starting at the 1 hour time point.

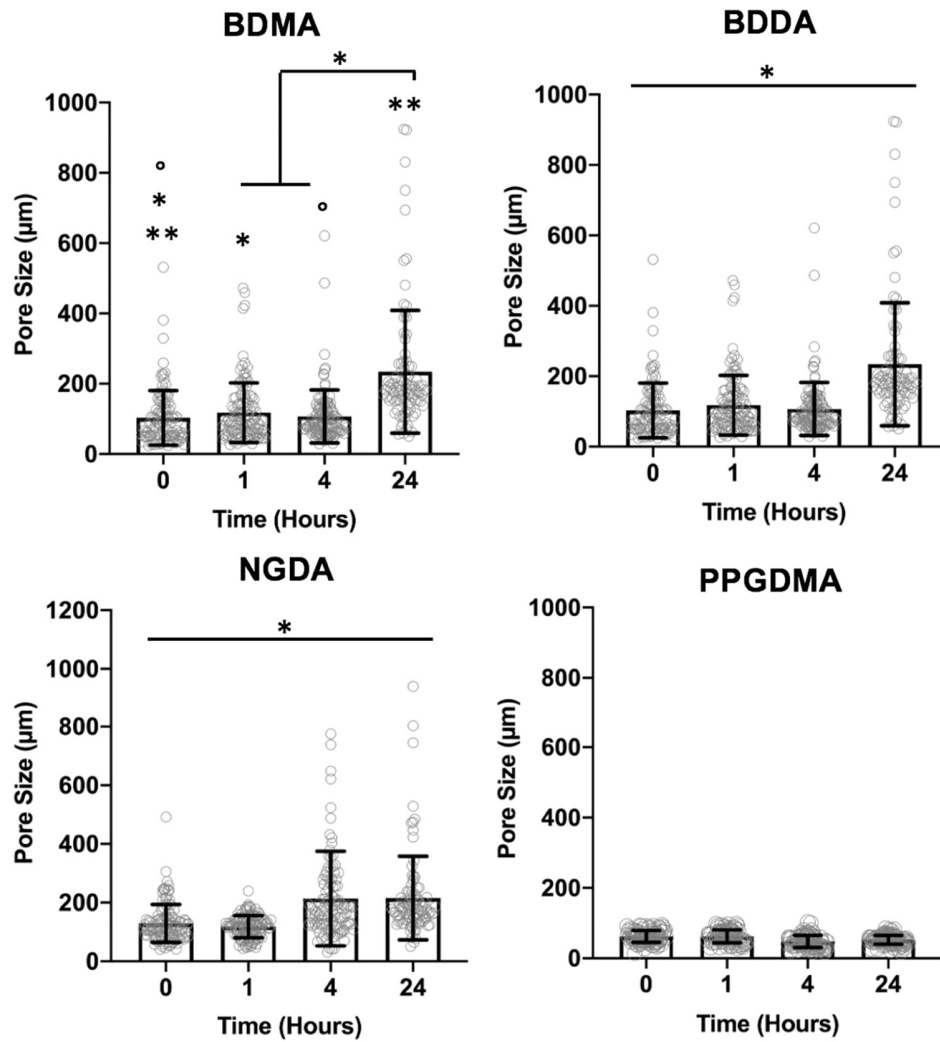

**Supplemental Figure 2:** Pore size distributions to evaluate changes in initial droplet size (time 0 on graphs corresponded to <2 min timepoint in SEM). Scale bar is 300  $\mu\text{m}$ . \*, °, and \*\* denotes statistical significance,  $p < 0.05$ .

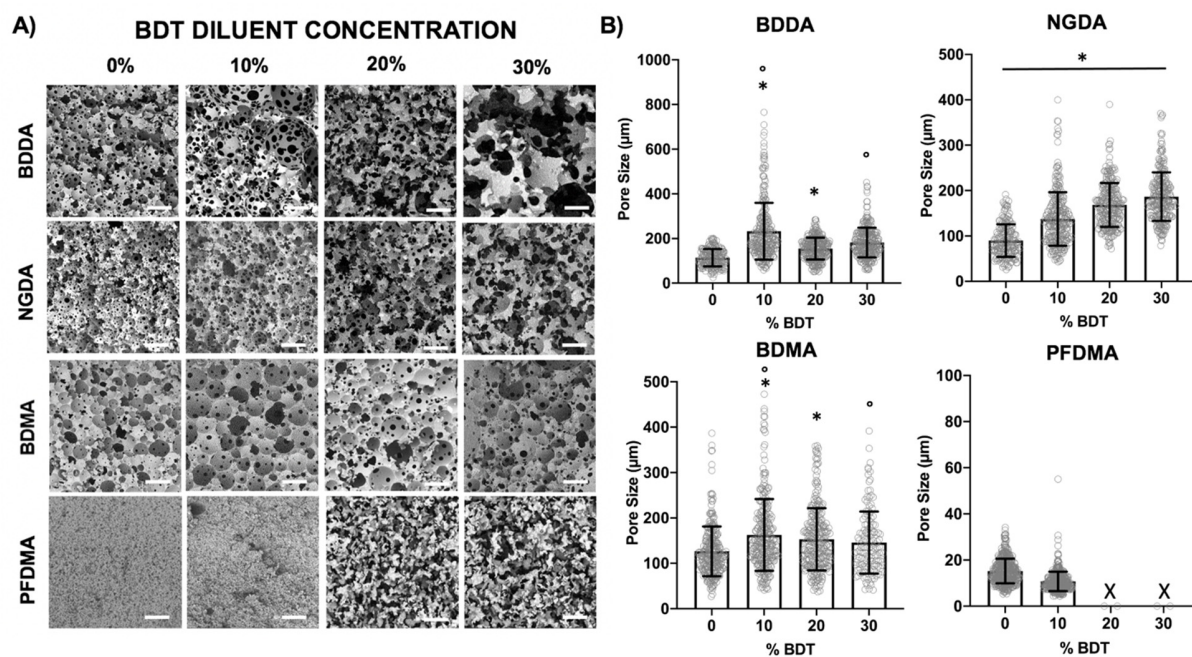

**Supplemental Figure 3:** Scanning electron micrographs of fracture planes of BDDA, NGDA, BDMA, and PFDMA polyHIPEs fabricated with 0, 10, 20, and 30 mol % reactive diluent concentration (A) and the effect of increasing reactive diluent concentration on polyHIPE pore size (B). Scale bar is 300  $\mu\text{m}$ . \* and ° denotes statistical significance,  $p < 0.05$ .
